# Supplementary material
Source: Springer Nature journal article supplement (https://www.springermedizin.de/resource/supplementary/12885_2012_3736_MOESM3_ESM.pdf/9465440)

**a) KRAS wild type ( $p=0.011$ )**

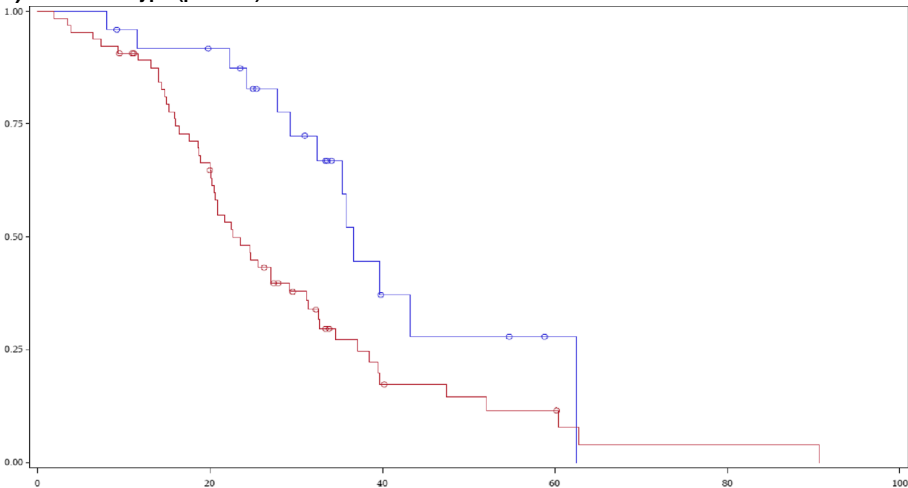

**b) KRAS mutated ( $p=0.022$ )**

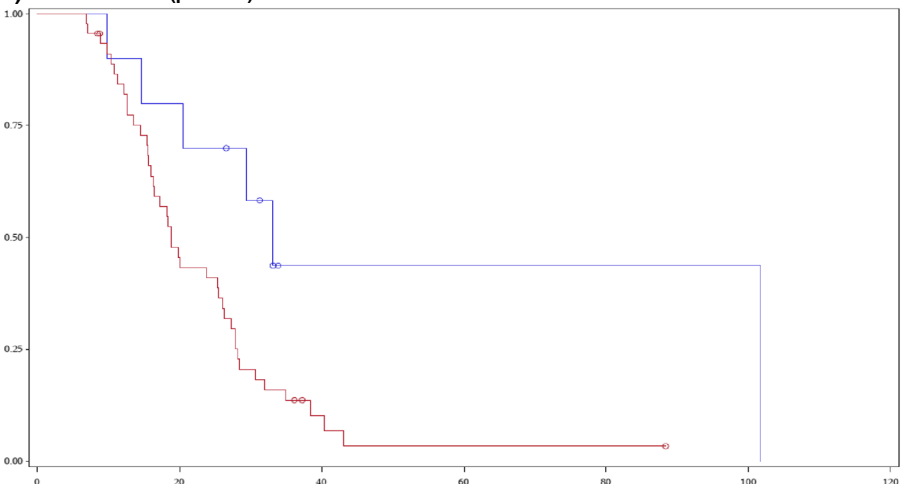

Supplement: MOESM3 [file 9465440]
